# Supplementary material for: Factors Influencing False-Negative Results of QuantiFERON-TB Gold In-Tube (QFT-GIT) in Active Tuberculosis and the Desirability of Resetting Cutoffs for Different Populations: A Retrospective Study
Source: MDPI journal article supplement (doi:10.3390/tropicalmed7100278), 2022-09-30
Supplement: s1 [file s1]

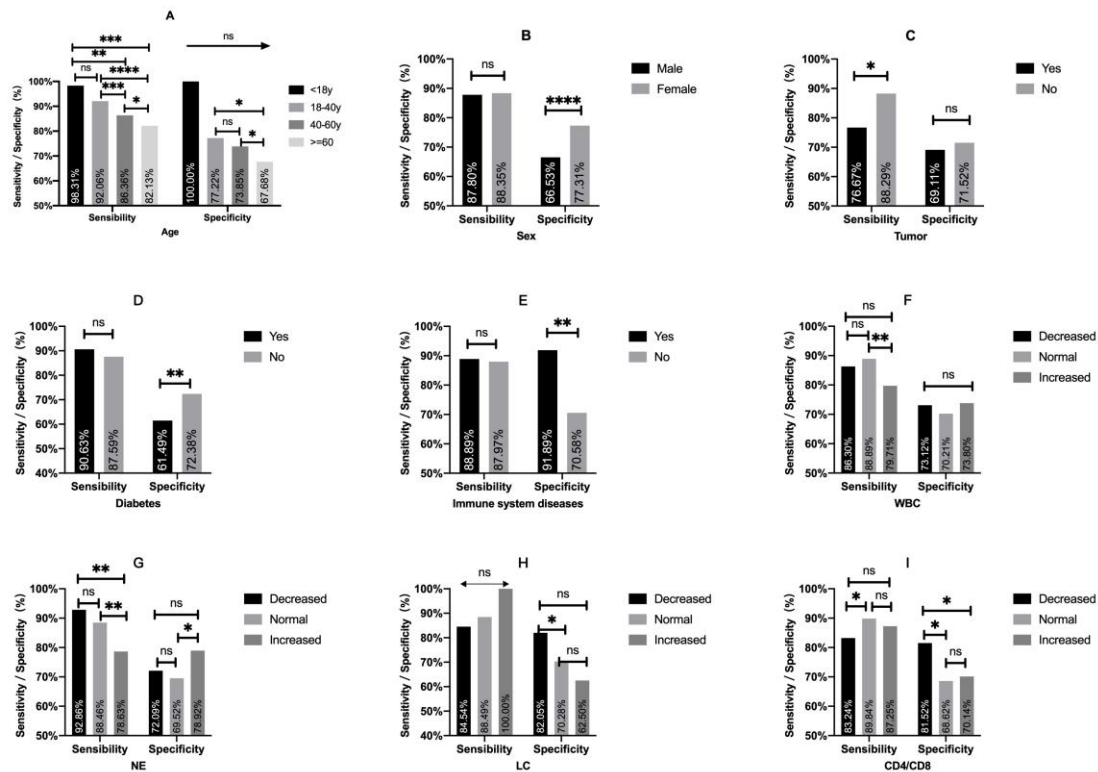

**Supplementary Materials Figure S1. Comparison of sensitivity (true-positive) and specificity (true-negative) of QFT-GIT by each influencing factor.** The comparison of sensitivity specificity between groups was represented by histogram, Statistical significance of the differences between groups were assessed by variance analysis, \* $P < 0.05$ , \*\* $P < 0.01$ , \*\*\* $P < 0.001$ , \*\*\*\* $P < 0.0001$ .
