# Supplementary material for: Factors Influencing False-Negative Results of QuantiFERON-TB Gold In-Tube (QFT-GIT) in Active Tuberculosis and the Desirability of Resetting Cutoffs for Different Populations: A Retrospective Study
Source: MDPI journal article supplement (doi:10.3390/tropicalmed7100278), 2022-09-30
Supplement: s1 [file s1]

**Supplementary Materials Table S1 Single-factor risk analysis of false-negative results of QFT-GIT in the diagnosis of bacterial-negative tuberculosis**

| Influencing factor | Group         | True        | False      | OR (95% CI)         | <i>p</i> |
|--------------------|---------------|-------------|------------|---------------------|----------|
|                    |               | Positive n  | Negative n |                     |          |
|                    |               | (%)         | (%)        |                     |          |
| Age                | <18 y         | 1 (100)     | 0 (0)      | 0.092 (0.012-0.679) | 0.019    |
|                    | 18-40 y       | 642 (91.5)  | 58 (8.5)   | 0.357 (0.246-0.520) | <0.001   |
|                    | 40-60 y       | 338 (83.3)  | 68 (16.7)  | 0.758 (0.525-1.094) | 0.138    |
|                    | ≥60 y         | 275 (79.0)  | 73 (21.0)  | Contrast            |          |
| Tumor              | Yes           | 32 (76.2)   | 10 (23.8)  | 0.495 (0.239-1.022) | 0.057    |
|                    | No            | 1223 (86.6) | 189 (13.4) |                     |          |
| Culture            | Positive      | 741 (91.1)  | 72 (8.9)   | 2.543 (1.865-3.468) | <0.001   |
|                    | Negative      | 514 (80.2)  | 127 (19.8) |                     |          |
| Site of TB         | intrapulmonar |             |            | 1.378 (0.824-       | 0.222    |
|                    | y             | 1505 (86.2) | 168 (13.8) | 2.305)              |          |
|                    | EPTB          | 50 (79.4)   | 13 (20.6)  | 2.239 (1.025-4.891) | 0.043    |

|         |           |             |            |                     |        |
|---------|-----------|-------------|------------|---------------------|--------|
|         | Merge     | 155 (89.6)  | 18 (10.4)  | Contrast            |        |
|         | Negative  | 562 (79.6)  | 144 (20.4) | Contrast            |        |
| WBC     | Decreased | 105 (86.8)  | 16 (13.2)  | 1.035 (0.596-1.799) | 0.902  |
|         | Increased | 47 (79.6)   | 16 (25.4)  | 2.313 (1.280-4.180) | 0.005  |
|         | Normal    | 1103 (86.9) | 166 (13.1) | Contrast            |        |
| NE      | Decreased | 74 (91.4)   | 7 (8.6)    | 0.629 (0.285-1.388) | 0.251  |
|         | Increased | 35 (70)     | 15 (30)    | 2.848 (1.522-5.328) | 0.001  |
|         | Normal    | 1092 (86.3) | 173 (13.7) | Contrast            |        |
| LC      | Decreased | 116 (88.5)  | 15 (11.5)  | 0.816 (0.466-1.431) | 0.478  |
|         | Increased | 4 (100)     | 0 (0)      | 1.184E-8            | <0.001 |
|         | Normal    | 356 (89.7)  | 41 (10.3)  | Contrast            |        |
| CD8     | Decreased | 494 (84.7)  | 89 (15.3)  | 1.564 (1.055-2.320) | 0.026  |
|         | Increased | 159 (84.6)  | 29 (15.4)  | 1.584 (0.950-2.640) | 0.078  |
|         | Normal    | 549 (88.1)  | 74 (11.9)  | Contrast            |        |
| CD4/CD8 | Decreased | 81 (81)     | 19 (19)    | 1.740 (0.999-3.033) | 0.051  |

|  |           |            |           |                     |       |
|--|-----------|------------|-----------|---------------------|-------|
|  | Increased | 379 (85.2) | 66 (14.8) | 1.292 (0.904-1.846) | 0.159 |
|--|-----------|------------|-----------|---------------------|-------|

**Supplementary Materials Table S2. Single-factor risk analysis of false-positive results of QFT-GIT in the diagnosis of bacterial-negative tuberculosis**

| Influencing factor | Group   | True       | False      | OR (95% CI)          | <i>p</i> |
|--------------------|---------|------------|------------|----------------------|----------|
|                    |         | Negative n | Positive n |                      |          |
|                    |         | (%)        | (%)        |                      |          |
| Age                | <18 y   | 6 (100)    | 1 (0)      | 2.612E-9             | <0.001   |
|                    | 18-40 y | 115 (77.7) | 33 (22.3)  | 0.569 (0.373-0.866)  | 0.008    |
|                    | 40-60 y | 333 (73.8) | 118 (26.2) | 0.702 (0.538-0.917)  | 0.009    |
|                    | ≥60 y   | 424 (66.5) | 214 (33.5) | Contrast             |          |
| Sex                | Male    | 473 (66.0) | 244 (34)   | 1.727 (1.338-2.228)  | <0.001   |
|                    | Female  | 405 (77.0) | 121 (23)   |                      |          |
| Diabetes           | Yes     | 89 (61.0)  | 57 (39)    | 0.610 (0.426-0.872)  | 0.007    |
|                    | No      | 789 (71.9) | 308 (28.1) |                      |          |
| Immune system      | Yes     | 32 (91.4)  | 3 (8.6)    | 4.564 (1.389-15.000) | 0.012    |
|                    | No      | 846 (70.0) | 362 (30.0) |                      |          |

| diseases |           |            |            |                     |       |
|----------|-----------|------------|------------|---------------------|-------|
| NE       | Normal    | 615 (69.0) | 276 (31.0) | Contrast            |       |
|          | Decreased | 57 (70.4)  | 24 (29.6)  | 0.938 (0.570-1.543) | 0.802 |
|          | Increased | 128 (78.5) | 35 (21.5)  | 0.609 (0.408-0.909) | 0.015 |
| LC       | Normal    | 739 (69.8) | 319 (30.2) | Contrast            |       |
|          | Decreased | 56 (81.2)  | 13 (18.8)  | 0.538 (0.290-0.997) | 0.049 |
|          | Increased | 5 (62.5)   | 3 (37.5)   | 1.390 (0.330-5.851) | 0.653 |
| CD4      | Normal    | 238 (66.1) | 122 (33.9) | Contrast            |       |
|          | Decreased | 149 (74.5) | 51 (25.5)  | 0.668 (0.454-0.982) | 0.040 |
|          | Increased | 300 (71.1) | 122 (28.9) | 0.793 (0.586-1.074) | 0.134 |
| CD4/CD8  | Normal    | 331 (67.3) | 161 (32.7) | Contrast            |       |
|          | Decreased | 72 (82.8)  | 15 (17.2)  | 0.428 (0.238-0.771) | 0.005 |
|          | Increased | 284 (70.5) | 119 (29.5) | 0.861 (0.648-1.146) | 0.305 |
